# 1 **Phylogenomics-guided discovery of a novel conserved** 2 **cassette of short linear motifs in BubR1 essential for the** 3 **spindle checkpoint**

4

5 Eelco Tromer<sup>1,4</sup>, Debora Bade<sup>1</sup>, Berend Snel<sup>4\*</sup>, Geert J.P.L. Kops<sup>1,2,3\*</sup>

6

7 <sup>1</sup> Hubrecht Institute – KNAW (Royal Netherlands Academy of Arts and Sciences)

8 Uppsalalaan 8, 3584 CT Utrecht, The Netherlands.

9 <sup>2</sup> Cancer Genomics Netherlands, and <sup>3</sup> Center for Molecular Medicine, University Medical

10 Center Utrecht, 3584 CG, Utrecht, The Netherlands.

11 <sup>4</sup>Theoretical Biology and Bioinformatics, Department of Biology, Science Faculty, Utrecht

12 University, 3584 CH Utrecht, The Netherlands.

13

14

15 \*Corresponding authors: [g.kops@hubrecht.eu](mailto:g.kops@hubrecht.eu) or [b.snel@uu.nl](mailto:b.snel@uu.nl)

16

## 17 **Abstract**

18 The spindle assembly checkpoint (SAC) maintains genomic integrity by preventing  
 19 progression of mitotic cell division until all chromosomes are stably attached to spindle  
 20 microtubules. The SAC critically relies on the paralogs Bub1 and BubR1/Mad3, which  
 21 integrate kinetochore-spindle attachment status with generation of the anaphase  
 22 inhibitory complex MCC. We previously reported on the widespread occurrences of  
 23 independent gene duplications of an ancestral ‘MadBub’ gene in eukaryotic evolution  
 24 and the striking parallel subfunctionalization that lead to loss of kinase function in  
 25 BubR1/Mad3-like paralogs. We now present an elaborate subfunctionalization analysis  
 26 that includes all known motifs in Bub1 and BubR1, and show that ancestral features are  
 27 consistently retained in the same functional paralog: GLEBS/CDI/CDII/kinase in the  
 28 Bub1-like and KEN1/KEN2/D-Box in the BubR1/Mad3-like. The recently described  
 29 ABBA motif can be found in either or both paralogs. We however discovered two  
 30 additional ABBA motifs that flank KEN2. This cassette of ABBA1-KEN2-ABBA2 forms a  
 31 strictly conserved module in all ancestral and BubR1/Mad3-like proteins, suggestive of  
 32 a specific and crucial SAC function. Indeed, deletion of the ABBA motifs in human  
 33 BUBR1 abrogates the SAC and affects APC/C-Cdc20 interactions. Our detailed  
 34 comparative genomics analyses thus enabled discovery of a conserved cassette of  
 35 motifs essential for the SAC and shows how this approach can be used to uncover  
 36 hitherto unrecognized functional protein features.

37

## 38 **Introduction**

39 Chromosome segregation during cell divisions in animals and fungi is monitored by a  
 40 cell cycle checkpoint known as the spindle assembly checkpoint (SAC) (Vleugel et al.,  
 41 2012; London and Biggins, 2014a; Musacchio, 2015). The SAC couples absence of stable  
 42 attachments between kinetochores and spindle microtubules to inhibition of anaphase  
 43 by assembling a four-subunit inhibitor of the anaphase-promoting complex (APC/C),  
 44 known as the MCC (Sacristan and Kops, 2015; Izawa and Pines, 2014; Chao et al., 2012).  
 45 The molecular pathway that senses lack of attachment and produces the MCC relies on  
 46 two related proteins known as Bub1 and BubR1/Mad3 (London and Biggins, 2014a).  
 47 Bub1 is a serine/threonine kinase that localizes to kinetochores and promotes  
 48 recruitment of MCC subunits and of factors that stimulate its assembly (Klebig et al.,  
 49 2009; London and Biggins, 2014b; Vleugel et al., 2015). These events are largely  
 50 independent of Bub1 kinase activity, however, which instead is essential for the  
 51 correction process of attachment errors (Kawashima et al., 2010; Klebig et al., 2009;  
 52 Andrews et al., 2004). BubR1/Mad3 is one of the MCC subunits, responsible for directly  
 53 preventing APC/C activity and anaphase onset (Tang et al., 2001; Sudakin et al., 2001;  
 54 Chao et al., 2012). It does so by contacting multiple molecules of the APC/C co-activator  
 55 Cdc20, preventing APC/C substrate access and binding of the E2 enzyme UbcH10 (Chao  
 56 et al., 2012; Izawa and Pines, 2014; Alfieri et al., 2016; Yamaguchi et al., 2016). The  
 57 BubR1/Mad3-Cdc20 contacts occur via various short linear motifs (SLiMs) known as  
 58 ABBA, KEN, and D-box (Alfieri et al., 2016; Chao et al., 2012; Lischetti et al., 2014; King  
 59 et al., 2007; DiFiore et al., 2015; Burton and Solomon, 2007b). Like Bub1, BubR1 also  
 60 impacts on the attachment error-correction process via a KARD motif that recruits the  
 61 PP2A-B56 phosphatase (Suijkerbuijk et al., 2012b; Kruse et al., 2013; Xu et al., 2013).

62 This may not however be a universal feature of BubR1/Mad3-like proteins, because  
63 many lack a KARD-like motif.

64

65 Bub1 and BubR1/Mad3 are paralogs. We previously showed they originated by similar  
66 but independent gene duplications from an ancestral MadBub gene in many lineages,  
67 and that the two resulting gene copies then subfunctionalized in remarkably  
68 comparable ways (Suijkerbuijk et al., 2012a). An ancestral N-terminal KEN motif (KEN1:  
69 essential for the SAC) and an ancestral C-terminal kinase domain (essential for  
70 attachment error-correction) were retained in only one of the paralogous genes in a  
71 mutually exclusive manner in virtually all lineages (i.e. one gene retained KEN but lost  
72 kinase, while the other retained kinase but lost KEN). One exception to this ‘rule’ are  
73 vertebrates where both paralogs have a kinase-like domain. The kinase domain of  
74 human BUBR1 however lacks enzymatic activity (i.e. is a pseudokinase) but instead  
75 confers stability onto the BUBR1 protein (Suijkerbuijk et al., 2012a).

76

77 The similar subfunctionalization of Bub1 and BubR1/Mad3-like paralogs was inferred  
78 from analysis of two domains (TPR and kinase) and one motif (KEN1). We set out to  
79 analyze whether any additional features specifically segregated to Bub1- or  
80 BubR1/Mad3-like proteins after duplications by designing an unbiased feature  
81 discovery pipeline and tracing feature evolution. The pipeline extracted all known and  
82 various previously unrecognized conserved motifs from Bub1/BubR1 family gene  
83 members. Two of these are novel ABBA motifs that flank KEN2 specifically in  
84 BubR1/Mad3-like proteins and we show that this highly conserved and ABBA-KEN2-  
85 ABBA cassette is crucial for the SAC in human cells.

86

## Results and Discussion

*Refined phylogenomic analysis of the MadBub gene family pinpoints 16 independent gene duplication events across the eukaryotic tree of life.*

To enable detailed reconstruction of subfunctionalization events of all known functional features after duplication of ancestral MadBub genes, we expanded our previously published set of homologs (Suijkerbuijk et al., 2012a) through broader sampling of sequenced eukaryotic genomes, focusing on sequences closely associated with duplication events (**supplementary sequence file 1**). Phylogenetic analyses of a multiple sequence alignment of the TPR domain (the only domain shared by all MadBub family members) of 149 MadBub homologs (**supplementary discussion** and **supplementary figure 1**) corroborated the ten independent duplications previously described (Suijkerbuijk et al., 2012a) and allowed for a more precise determination of the age of the duplications. Strikingly, we found evidence for a number of additional independent duplications: Three duplications in stramenopile species of the SAR super group (*Albuginaceae* {#10 in **figure 1b**}, *E. siliculosus* {#11} and *A. anophagefferens* {#12}) and one at the base of basidiomycete fungi ({#4}, puccinioimycetes). The BUBR1 paralog in teleost fish underwent a duplication and fission event, of which the C-terminus product was retained only in the lineage leading to zebra fish (*D. rerio* {#7}). Lastly, through addition of recently sequenced genomes we could specify a duplication around the time plants started to colonize land ({#13}, bryophytes) and an independent duplication in the ancestor of higher plants ({#14}, tracheophytes), followed by a duplication in the ancestor of the flowering plants ({#15}, magnoliaphytes). These gave rise to three MadBub homologs, signifying additional subfunctionalization of the paralogs in the plant model organism *A. thaliana*. It thus seems to be the case that such

striking parallel subfunctionalization as we originally identified, is indeed predictive for more of its occurrence in lineages whose genome sequences have since been elucidated.

*De novo discovery, phylogenetic distribution and fate after duplication of functional motifs in the MadBub gene family.*

Previous analyses revealed a recurrent pattern of mutually exclusive retention of an N-terminal KEN-box and a C-terminal kinase domain after duplication of an ancestral MadBub (Suijkerbuijk et al., 2012a; Murray, 2012). These patterns suggested the hypothesis of paralog subfunctionalization towards either inhibition of the APC/C in the cytosol (retaining the KEN-box) or attachment-error correction at the kinetochore (retaining the kinase domain). Given the extensive sequence divergence of MadBub homologs and a scala of different known functional elements, we reasoned that a comprehensive analysis of MadBub gene duplicates would provide opportunities for the discovery of novel and co-evolving ancestral features. For clarity we refer to the Bub1-like paralog (C-terminal kinase domain) as BUB and the BubR1/Mad3-like paralog (N-terminal KEN box) as MAD throughout the rest of this manuscript.

To capture conserved ancestral features of diverse eukaryotic MadBub homologs, we constructed a sensitive de novo motif and domain discovery pipeline (ConFeaX: conserved feature extraction) similar to our previous approach used to characterize KNL1 evolution (Tromer et al., 2015). In short, the MEME algorithm (Bailey et al., 2009) was used to search for significantly similar gapless amino acid motifs, and extended motifs were aligned by MAFFT (Kato and Standley, 2013). Alignments were modeled using HMMER (Eddy, 2011) and sensitive profile HMM searches were iterated and specifically optimized using permissive E-values/bit scores until convergence

(**methods** and **figure 1a**). Due to the degenerate nature of the detected short linear motifs, we manually scrutinized the results for incorrectly identified features and supplemented known motif instances, when applicable. We preferred ConFeaX over other de novo motif discovery methods (e.g. Davey et al., 2012 Nguyen Ba et al., 2012) as it does not rely on high quality full length alignment of protein sequences and allows detection of repeated or dynamic non-syntenic conserved features (which is a common feature for SLiMs). It is therefore better tuned to finding conserved features over long evolutionary distances in general and specifically in this case where recurrent duplication and subfunctionalization hamper conventional multiple sequence alignment based analysis.

ConFeaX identified known functional motifs and domains and in some cases extended their definition: KEN1 (Murray and Marks, 2001), KEN2 (Burton and Solomon, 2007a), GLEBS (Taylor et al., 1998), KARD (Suijkerbuijk et al., 2012b; Xu et al., 2013; Kruse et al., 2013), CDI (Klebig et al., 2009), D-box (Burton and Solomon, 2007a), CDII (a co-activator domain of BUB1 (Kang et al., 2008; Klebig et al., 2009)) and the recently discovered ABBA motif (termed ABBA3 in **figure 3**) (DiFiore et al., 2015; Lischetti et al., 2014) (**figure 1a, supplementary table II and supplementary sequence file 2**). The TPR and the kinase domain were annotated using profile searches of previously established models (Suijkerbuijk et al., 2012a) and excluded from de novo sequence searches. KEN1 and KEN2 could be discriminated by differentially conserved residues surrounding the core KEN box (**figure 1a**). Those surrounding KEN1 are involved in the formation of the helix-turn-helix motif that positions yeast Mad3 towards Cdc20 (Chao et al., 2012), while two pseudo-symmetrically conserved tryptophan residues with unknown function specifically defined KEN2. Furthermore, we found that the third

position of the canonical ABBA motif is often occupied by a proline residue and the first position in ascomycetes (fungi) is often substituted for a polar amino acid [KRN] (**figure 1a**), signifying potential lineage-specific changes in Cdc20-ABBA interactions. Last, we also discovered a novel motif predominantly associated with the MAD paralog in basidiomycetes, plants, amoeba and stramenopiles but not metazoa, which we termed conserved motif I (CMI) (**figure 1a**).

Projection of the conserved ancestral features onto the MadBub gene phylogeny provided a highly detailed overview of MadBub motif evolution (**figure 1b**, **supplementary figure 1b**). We found that the core functional motifs and domains (TPR, KEN1, KEN2, ABBA, D-box, GLEBS, CMI, CDI, CDII and kinase) are present throughout the eukaryotic tree of life, representing the core features that were likely part of the SAC signaling network in the last eukaryotic common ancestor (LECA). Of note are lineages (nematodes, flatworms (*S. mansoni*), dinoflagellates (*S. minutum*) and early-branching fungi (microsporidia and *C. coronatus*)) for which multiple features were either lost or considerably divergent (**supplementary figure 1b**). Especially interesting is *C. elegans* in both KEN boxes and the GLEBS domain appeared to have been degenerated (ceMAD=san-1) and the CDI domain is lost (ceBUB=bub-1), indicating extensive rewiring or a less essential role of the SAC in nematode species, as has been suggested recently (Davey and Morgan, 2016; Moyle et al., 2014).

Our motif discovery analyses revealed the CDC20/Cdh1-interacting ABBA motif to be much more abundant than the single instances that were previously reported for BUBR1 and BUB1 in humans (Lischetti et al., 2014; DiFiore et al., 2015). We observed three different contexts for the ABBA motifs (**figure 1b**, **supplementary figure 1b**): (1)



in repeat arrays (e.g. MAD of *P. patens*, basidiomycetes and stramenopiles), (2) in the vicinity of CDI (many instances) and/or D-box/KEN (e.g. human), and (3) as two highly conserved ABBA motifs flanking KEN2 (virtually all species). Because of the positional conservation of the latter, we have termed these, ABBA1 and ABBA2. Any additional ABBA motifs were pooled in the category 'ABBA-other'.

In order to track the fate of the features discovered using ConFeaX, we quantified their co-presences and absences, as a proxy for co-evolution, by calculating the Pearson correlation coefficient ( $r$ ) for the profiles of each domain/motif pair of 16 duplicated MadBub homologs (**figure 1b**) (Wu et al., 2003). Subsequent average clustering of the Pearson distance ( $d=1-r$ ) revealed two sets of co-segregating and anti-correlated conserved features (**figure 2a+b**) consistent with our hypothesis that MadBub gene duplication caused parallel subfunctionalization of features towards the kinetochore (mainly BUB) and the cytosol (MAD) (Suijkerbuijk et al., 2012a). GLEBS, CDI, ABBA-other, KARD, CDII and the kinase domain formed a coherent cluster of features with bona fide function at the kinetochore. For a detailed discussion on several intriguing observations regarding presence/absence of these motifs in several eukaryotic lineages, and what this may mean for BUB/MAD and SAC function in these lineages, see **Supplementary Discussion**. A second cluster contained known motifs that bind and interact with (multiple) CDC20 molecules, including KEN1, KEN2, and (to a lesser extent) the D-box. Our newly discovered ABBA motifs that flank KEN2 were tightly associated with KEN2 and KEN1 (**figure 2**). As such, the ABBA1-KEN2-ABBA2 cassette (**Figure 3a**) co-segregated with MAD function during subfunctionalization of MadBub gene duplicates. Although the D-box often co-occurs with the KEN-ABBA cluster, this motif was occasionally lost (e.g. archeplastids, *S. pombe* and *A. anophagefferens*).

Finally, CMI co-segregated with the Cdc20-interacting motifs (Figure 2a), suggesting a MAD-specific role for this newly discovered motif (possibly in MCC function and/or Cdc20-binding) in species harboring it such as plants, basidiomycetes and stramenopiles.

*The conserved ABBA1-KEN2-ABBA2 cassette is essential for proper SAC signaling in human cells*

The strong correlation of the ABBA1-KEN2-ABBA2 cassette with KEN1 and the D-box, urged us to examine the role of these motifs in BUBR1-dependent SAC signaling in human cells. We therefore generated stable isogenic HeLa FlpIn cell lines expressing doxycyclin-inducible versions of LAP-tagged BUBR1 (Suijkerbuijk et al., 2010). These included:  $\Delta$ ABBA1,  $\Delta$ ABBA2,  $\Delta$ ABBA1+2, alanine-substitutions of the two KEN2-flanking tryptophans (W1-A, W2-A and W1/2-A), KEN1-AAA KEN2-AAA,  $\Delta$ ABBA3 and  $\Delta$ D-box (**figure 3a-c**). The SAC was severely compromised in cells depleted of endogenous BUBR1 by RNAi, as measured by inability to maintain mitotic arrest upon treatment with S-trityl-L-cysteine (STLC) (Ogo et al., 2007) (median( $m$ ) = 50 minutes (min.) from NEBD to mitotic exit, compared control ( $m > 500$  min.)) (**figure 3d-e**). SAC proficiency was restored by expression of siRNA-resistant LAP-BUBR1 ( $m > 500$  min.). As shown previously (Burton and Solomon, 2007a; Elowe et al., 2010; Lara-Gonzalez et al., 2011), mutants of KEN1, KEN2 and the D-box strongly affected the SAC. Importantly, BUBR1 lacking ABBA1 or ABBA2 or both, or either of the two tryptophans, could not rescue the SAC (**figure 3e**). We observed a consistently stronger phenotype for the mutated motifs on the N-terminal side of KEN2 ( $\Delta$ ABBA1 ( $m = 65$  min.) and W1-A ( $m = 165$  min.)) compared to those on the C-terminal side ( $\Delta$ ABBA2 ( $m = 200$  min.) and W2-A ( $m = 260$  min.)). The double ABBA (1/2) and tryptophan (1/2) mutants were however further

compromised ( $m = 50$  and  $110$  min., respectively), suggesting non-redundant functions. As expected from the interaction of ABBA motifs with the WD40 domain of CDC20 and CDH1 (DiFiore et al., 2015), BUBR1 lacking ABBA1 and/or ABBA2 was less efficient in binding APC/C-Cdc20 in mitotic human cells, to a similar extent as mutations in KEN1 (**figure 3f**). In our hands ABBA1 and 2 mutants were more strongly deficient in SAC signaling and APC/C-Cdc20 binding than the previously described ABBA motif (ABBA3) (**figure 3d-e**). In conclusion therefore, the ABBA1-KEN2-ABBA2 cassette in BUBR1 is essential for APC/C inhibition by the SAC.

We here discovered a symmetric cassette of SLiMs containing two Cdc20-binding ABBA motifs and KEN2. This cassette strongly co-occurs with KEN1 in MAD-like and MadBub proteins throughout eukaryotic evolution and has important contributions to the SAC in human cells. Our co-precipitation experiments along with the known roles for ABBA-like motifs and KEN2 and their recent modeling into the MCC-APC/C structure (Alfieri et al., 2016; Yamaguchi et al., 2016) strongly suggest that the ABBA1-W-KEN2-W-ABBA2 cassette interacts with one or multiple Cdc20 molecules. Together with KEN1, these interactions likely regulate affinity of MCC for APC/C or its positioning once bound to APC/C. The constellation of interactions between Cdc20 molecules and the various Cdc20-binding motifs in one molecule of BUBR1 (3x ABBA, 2x KEN and a D-box) is not immediately obvious, and will have to await detailed atomic insights. The symmetric arrangement of the cassette may be significant in this regard, as is the observation that (despite a highly conserved WD40 structure of Cdc20) the length of spacing between the ABBA motifs and KEN2 is highly variable between species. A more detailed understanding of SAC function may be aided by ConFeaX-driven discovery of lineage-

specific conserved features in the MadBub family when more genome sequences become available, as well as of features in other SAC proteins families.

## **Supplementary information**

Supplementary information included Supplementary discussion, 2 figures, 3 tables and 2 sequence files.

## Methods

### *Phylogenomic analysis*

We performed iterated sensitive homology searches with jackhammer (Finn et al., 2011) (based on the TPR, kinase, CDI, GLEBS and KEN boxes) using a permissive E-value and bitscore cut-off to include diverged homologs on uniprot release 2016\_08 and Ensemble Genomes 32 (<http://www.ebi.ac.uk/Tools/hmmer/search/jackhammer>). Incompletely predicted genes were searched against whole genome shotgun contigs (wgs, <http://www.ncbi.nlm.nih.gov/genbank/wgs>) using tblastn. Significant hits were manually predicted using AUGUST (Stanke et al., 2006) and GENESCAN (Burge and Karlin, 1997). In total we used 152 MadBub homologs (**supplementary sequence file 1**). The TPR domains of 148 sequences were aligned using MAFFT-LINSI (Katoh and Standley, 2013); only columns with 80% occupancy were considered for further analysis. Phylogenetic analysis of the resulting multiple sequence alignment was performed using RAxML (Stamatakis, 2014) (**supplementary figure 1a**). Model selection was performed using Prot Test (Darriba et al., 2011) (Akaike Information Criterion); LG+G was chosen as the evolutionary model.

### *Conserved Feature Extraction and subfunctionalization analysis*

ConFeaX starts with a probabilistic search for short conserved regions (max 50) using the MEME algorithm (option: any number of repeats) (Bailey et al., 2009). Significant motif hits are extended on both sides by 5 residues to compensate for the strict treatment of alignment information by the MEME algorithm. Next, MAFFT-LINSI (Katoh and Standley, 2013) introduces gaps and the alignments are modeled using the HMMER package (Eddy, 2011) and used to search for hits that are missed by the MEME

algorithm. Subsequent alignment and HMM searches were iterated until convergence. For short linear motifs with few conserved positions, specific optimization of the alignments and HMM models using permissive E-values/bit scores was needed (*e.g.* ABBA motif and D-box). Sequence logos were obtained using weblogo2 (Crooks et al., 2004). Subsequently, from each of the conserved features, a phylogenetic profile was derived (present is '1' and absent is '0') for all duplicated MadBub sequences as presented in figure 1. For all possible pairs, we determined the correlation using Pearson correlation coefficient (Wu et al., 2003). Average clustering based on Pearson distances ( $d=1-r$ ) was used to indicate sub-functionalization.

### *Cell culture, transfection and plasmids*

HeLa FlpIn T-rex cells were grown in DMEM high glucose supplemented with 10% Tet-free FBS (Clontech), penicillin/streptomycin (50 mg ml<sup>-1</sup>), alanyl-glutamine (Sigma; 2 mM). pCDNA5-constructs were co-transfected with pOgg44 recombinase in a 10:1 ratio (Klebig et al., 2009) using FuGEHE HD (Roche) as a transfection reagent. After transfection, the medium was supplemented with puromycin (1 µg ml<sup>-1</sup>) and blasticidin (8 µg ml<sup>-1</sup>) until cells were fully confluent in a 10cm culture dish. siBUBR1 (5'-AGAUCUGGCUAACUGUUCUU-3' custom Dharmacon) was transfected using Hiperfect (Qiagen) at 40 nM for 48h according to manufacturer's guidelines. RNAi-resistant LAP (YFP)-BUBR1 was sub cloned from plc58 (Suijkerbuijk et al., 2010) into pCDNA5.1-puro using AflII and BamHI restriction sites. To acquire mutants, site-directed mutagenesis was performed using the quickchange strategy (for primer sequences see **supplementary table III**).

### *Live cell imaging*

For live cell imaging experiments, the stable HeLa-FlpIn-TREx cells were transfected with 40nM siRNA (start and at 24 hrs). After 24 hrs, the medium was supplemented with thymidine (2.5 mM) and doxycyclin (2  $\mu\text{g ml}^{-1}$ ) for 24 hrs to arrest cells in early S-phase and to induce expression of the stably integrated construct, respectively. After 48 hrs, cells were released for 3 hrs and arrested in prometaphase of the mitotic cell cycle (after ~8-10 hrs) by the addition of the Eg5 inhibitor S-trityl-L-cysteine (STLC, 20  $\mu\text{M}$ ). HeLa cells were imaged (DIC) in a heated chamber (37 °C, 5% CO<sub>2</sub>) using a CFI S Plan Fluor ELWD 20x/NA 0.45 dry objective on a Nikon Ti-Eclipse wide field microscope controlled by NIS software (Nikon). Images were acquired using an Andor Zyla 4.2 sCMOS camera and processed using NIS software (Nikon) and ImageJ.

#### *Immuno-precipitation and Western blot*

HeLa-FlpIn-TREx cells were induced with doxycyclin (2  $\mu\text{g ml}^{-1}$ ) 48 hrs before harvesting. Synchronization by thymidine (2 mM) for 24 hrs and release for 10 hrs into Taxol (2  $\mu\text{M}$ ) arrested cells in prometaphase. Cells were collected by mitotic shake-off. Lysis was done in 50 mM Tris-HCl (pH 7.5), 100 mM NaCl, 0.5% NP40, 1mM EDTA, 1mM DTT, protease inhibitor cocktail (Roche) and phosphatase inhibitor cocktails 2 and 3 (Sigma). Complexes were purified using GFP-Trap beads (ChromoTek) for 15 min at 4°C. Precipitated proteins were washed with lysis buffer and eluted in 5x SDS sample buffer. Primary antibodies were used at the following dilutions for western blotting: BUBR1 (A300-386A Bethyl) 1:2000, alpha-Tubulin (T9026 Sigma) 1:5000, GFP (Custom) 1:10 000, APC1 (A301-653A Bethyl) 1:2500, APC3 (gift from Phil Hieter) 1:2000, MAD2 (Custom) 1:2000, CDC20 (A301-180A Bethyl) 1:1000. Western blot signals were detected by chemiluminescence using an ImageQuant LAS 4000 (GE Healthcare) imager.

## Author contributions

ET performed the motif search, phylogenetic analysis and SAC assays. DB performed the immunoprecipitation and western blot analyses. GK, BS conceived and managed the project. ET, BS and GK wrote the manuscript.

## Acknowledgements

The authors thank the Snel and Kops lab for discussion and feedback. We thank Bas de Wolf and Laura Demmers for making cell lines. This work was supported by the UMC Utrecht and is part of the VICI research programme with project number 016.160.638, which is (partly) financed by the Netherlands Organisation for Scientific Research (NWO). DB was supported by a DFG fellowship with number BA 5417/1-1, which is financed by the German Research Foundation (DFG).

## Competing Financial Interests

The authors declare no competing financial interests.



## Figure Legends

### **Figure 1 – Fate of conserved functional sequence features after 16 independent duplications of the MADBUB gene family throughout eukaryotic evolution (A)**

Overview of the de novo sequence discovery pipeline ConFeaX including the ancestral conserved features of a search against the eukaryotic MADBUB gene family. The consensus sequences of the detected conserved motifs are depicted as a sequence logo (colors reflect distinct amino acid properties and height of the letters indicates conservation of amino acids). Each features is assigned a differently colored shape. (B) Cartoon of the evolutionary scenario of 16 independent duplications of the MADBUB gene family throughout eukaryotic evolution, including a projection of conserved features onto the linear protein representation (on scale). Gene duplications are indicated by an arrow (red: high confidence, orange: uncertain). The subfunctionalized paralogs MAD and BUB are color brown and blue, respectively. Numbers indicate the clades in which the duplications occurred: {1}-mucorales; {2}- saccharomycetaceae; {3}-schizosaccharomycetes; {4}-pucciniomycetes; {5}-agaricomycetes (excluding early-branching species); {6}-vertebrates; {7}-teleost fish; {8}-nematodes; {9}-diptera (flies); {10}-albuginaceae (oomycete); {11}-ectocarpales (brow algae); {12}-aureococcus (harmful algae bloom); {13}-bryophytes (mosses); {14}-tracheophytes (vascular plants); {15}-magnoliaphytes (flowering plants); {16}-naegleria;

### **Figure 2 – Co-evolution of conserved features signify subfunctionalization of MAD and BUB after MADBUB duplication (A)**

Average clustering based on pearson distances of conserved ancestral feature correlation matrix ( $d=1-r$ ) of MADBUB paralogs. Blue and red indicate co-presence or absence of features to be present in the

same paralog. (B) Evolutionary scenario of MADBUB subfunctionalization: MAD (cytosol) as a SAC effector and BUB (kinetochore) involved in SAC signal formation and kinetochore microtubule attachment.

**Figure 3 – The evolutionary conserved cassette ABBA1-KEN2-ABBA2 in BUBR1 is essential for SAC signaling** (A) Alignment of ABBA1-KEN2-ABBA2 cassette (red). Linkers (black) between ABBA motifs and KEN2 are indicated by {n}. The sequence logo on top is representative for all eukaryotic sequences (colors reflect distinct amino acid properties and height of the letters indicates conservation of amino acids). (B) Schematic representation of LAP-hBUBR1 mutants. Color-coding is consistent for each mutant in this figure (C) Immunoblots of BUBR1 and tubulin of mitotic lysates of HeLa FlpIn cell lines stably expressing LAP-tagged BUBR1 proteins. Cells were treated with siRNA (40nM) for 48 hours and cells were released and arrested into taxol after double thymidine block. (E) Time-lapse analysis of HeLa FlpIn cells expressing hBUBR1 mutants, treated with 20  $\mu$ M STLC. Data (n=50, N=3) indicate the mean of cumulative fraction of cells that exit mitosis after nuclear envelope breakdown. Transparent regions represent the standard error of the mean. Values between accolades {} indicate the median value. Cells were score by cell morphology using DIC imaging (D); see for examples of SAC deficient ( $\Delta$ ABBA1/2) and proficient cells (wildtype). (F) Immunoblots of GFP, APC3 and CDC20 in LAP-BUBR1 precipitations (LAP-pulldown) in whole cell lysates of mitotic HeLa FlpIn cells stably expressing LAP-BUBR1 mutant constructs.

## References

- Alfieri, C., L. Chang, Z. Zhang, J. Yang, S. Maslen, M. Skehel, and D. Barford. 2016. Molecular basis of APC/C regulation by the spindle assembly checkpoint. *Nature*. 536:431–436. doi:10.1038/nature19083.
- Andrews, P.D., Y. Ovechkina, N. Morrice, M. Wagenbach, K. Duncan, L. Wordeman, and J.R. Swedlow. 2004. Probing the catalytic functions of Bub1 kinase using the small molecule inhibitors BAY-320 and BAY-524. *Dev. Cell*. 6:253–268. doi:10.1016/S1534-5807(04)00025-5.
- Bailey, T.L., M. Boden, F. a Buske, M. Frith, C.E. Grant, L. Clementi, J. Ren, W.W. Li, and W.S. Noble. 2009. MEME SUITE: tools for motif discovery and searching. *Conflict*. 37:202–208. doi:10.1093/nar/gkp335.
- Baron, A.P., C. von Schubert, F. Cubizolles, G. Siemeister, M. Hitchcock, A. Mengel, J. Schroder, A. Fernández-Montalván, F. von Nussbaum, D. Mumberg, and E.A. Nigg. 2016. Probing the catalytic functions of Bub1 kinase using the small molecule inhibitors BAY-320 and BAY-524. *Elife*. 5. doi:10.7554/eLife.12187.
- Burge, C., and S. Karlin. 1997. Prediction of complete gene structures in human genomic DNA. *J. Mol. Biol.* 268:78–94. doi:10.1006/jmbi.1997.0951.
- Burton, J.L., and M.J. Solomon. 2007a. Mad3p, a pseudosubstrate inhibitor of APCCdc20 in the spindle assembly checkpoint. *Genes Dev.* 21:655–667. doi:10.1101/gad.1511107.
- Burton, J.L., and M.J. Solomon. 2007b. Mad3p, a pseudosubstrate inhibitor of APCCdc20 in the spindle assembly checkpoint. *Genes Dev.* 21:655–67. doi:10.1101/gad.1511107.
- Chao, W.C.H., K. Kulkarni, Z. Zhang, E.H. Kong, and D. Barford. 2012. Structure of the

427 mitotic checkpoint complex. *Nature*. 484:208–213. doi:10.1038/nature10896.

428 Crooks, G.E., G. Hon, J.-M.M. Chandonia, and S.E. Brenner. 2004. WebLogo: a sequence  
429 logo generator. *Genome Res.* 14:1188–1190. doi:10.1101/gr.849004.

430 Darriba, D., G.L. Taboada, R. Doallo, and D. Posada. 2011. ProtTest 3: fast selection of  
431 best-fit models of protein evolution. *Bioinformatics*. 27:1164–5.  
432 doi:10.1093/bioinformatics/btr088.

433 Davey, N.E., J.L. Cowan, D.C. Shields, T.J. Gibson, M.J. Coldwell, and R.J. Edwards. 2012.  
434 SLiMPrints: conservation-based discovery of functional motif fingerprints in  
435 intrinsically disordered protein regions. *Nucleic Acids Res.* 40:10628–41.  
436 doi:10.1093/nar/gks854.

437 Davey, N.E., and D.O. Morgan. 2016. Building a Regulatory Network with Short Linear  
438 Sequence Motifs: Lessons from the Degrons of the Anaphase-Promoting Complex.  
439 *Mol. Cell.* 64:12–23. doi:10.1016/j.molcel.2016.09.006.

440 DiFiore, B., N. Davey, A. Hagting, D. Izawa, J. Mansfeld, T. Gibson, and J. Pines. 2015. The  
441 ABBA Motif binds APC/C activators and is shared by APC/C substrates and  
442 regulators. *Dev. Cell.* 32:358–372. doi:10.1016/j.devcel.2015.01.003.

443 Eddy, S.R. 2011. Accelerated profile HMM searches. *PLoS Comput. Biol.* 7.  
444 doi:10.1371/journal.pcbi.1002195.

445 Elowe, S., K. Dulla, A. Uldschmid, X. Li, Z. Dou, and E.A. Nigg. 2010. Uncoupling of the  
446 spindle-checkpoint and chromosome-congression functions of BubR1. *J. Cell Sci.*  
447 123:84–94. doi:10.1242/jcs.056507.

448 Finn, R.D., J. Clements, and S.R. Eddy. 2011. HMMER web server: Interactive sequence  
449 similarity searching. *Nucleic Acids Res.* 39:W29–37. doi:10.1093/nar/gkr367.

450 Izawa, D., and J. Pines. 2014. The mitotic checkpoint complex binds a second CDC20 to  
451 inhibit active APC/C. *Nature*. 517:631–634. doi:10.1038/nature13911.

452 Kang, J., M. Yang, B. Li, W. Qi, C. Zhang, K.M. Shokat, D.R. Tomchick, M. Machius, and H.  
 453 Yu. 2008. Structure and Substrate Recruitment of the Human Spindle Checkpoint  
 454 Kinase Bub1. *Mol. Cell.* 32:394–405. doi:10.1016/j.molcel.2008.09.017.

455 Katoh, K., and D.M. Standley. 2013. MAFFT multiple sequence alignment software  
 456 version 7: improvements in performance and usability. *Mol. Biol. Evol.* 30:772–780.  
 457 doi:10.1093/molbev/mst01.

458 Kawashima, S. a, Y. Yamagishi, T. Honda, K. Ishiguro, and Y. Watanabe. 2010.  
 459 Phosphorylation of H2A by Bub1 prevents chromosomal instability through  
 460 localizing shugoshin. *Science.* 327:172–177. doi:10.1126/science.1180189.

461 King, E.M.J., S.J.A. van der Sar, and K.G. Hardwick. 2007. Mad3 KEN Boxes Mediate both  
 462 Cdc20 and Mad3 Turnover, and Are Critical for the Spindle Checkpoint. *PLoS One.*  
 463 2:e342. doi:10.1371/journal.pone.0000342.

464 Klebig, C., D. Korinth, and P. Meraldi. 2009. Bub1 regulates chromosome segregation in a  
 465 kinetochore-independent manner. *J. Cell Biol.* 185:841–858.  
 466 doi:10.1083/jcb.200902128.

467 Kruse, T., G. Zhang, M.S.Y. Larsen, T. Lischetti, W. Streicher, T. Kragh Nielsen, S.P. Bjørn,  
 468 and J. Nilsson. 2013. Direct binding between BubR1 and B56-PP2A phosphatase  
 469 complexes regulate mitotic progression. *J. Cell Sci.* 126:1086–1092.

470 Lara-Gonzalez, P., M.I.F. Scott, M. Diez, O. Sen, and S.S. Taylor. 2011. BubR1 blocks  
 471 substrate recruitment to the APC/C in a KEN-box-dependent manner. *J. Cell Sci.*  
 472 124:4332–4345. doi:10.1242/jcs.094763.

473 Lischetti, T., G. Zhang, G.G. Sedgwick, V.M. Bolanos-Garcia, and J. Nilsson. 2014. The  
 474 internal Cdc20 binding site in BubR1 facilitates both spindle assembly checkpoint  
 475 signalling and silencing. *Nat. Commun.* 5:5563. doi:10.1038/ncomms6563.

476 London, N., and S. Biggins. 2014a. Signalling dynamics in the spindle checkpoint

477 response. *Nat. Rev. Mol. Cell Biol.* 15:736–47. doi:10.1038/nrm3888.

478 London, N., and S. Biggins. 2014b. Mad1 kinetochore recruitment by Mps1-mediated  
 479 phosphorylation of Bub1 signals the spindle checkpoint. *Genes Dev.* 28:140–152.  
 480 doi:10.1101/gad.233700.113.

481 Moyle, M.W., T. Kim, N. Hattersley, J. Espeut, D.K. Cheerambathur, K. Oegema, and A.  
 482 Desai. 2014. A Bub1-Mad1 interaction targets the Mad1-Mad2 complex to  
 483 unattached kinetochores to initiate the spindle checkpoint. *J. Cell Biol.* 204:647–  
 484 657. doi:10.1083/jcb.201311015.

485 Murray, A.W. 2012. Don't make me mad, Bub! *Dev. Cell.* 22:1123–5.  
 486 doi:10.1016/j.devcel.2012.05.020.

487 Murray, A.W., and D. Marks. 2001. Can sequencing shed light on cell cycling? *Nature.*  
 488 409:844–846. doi:10.1038/35057033.

489 Musacchio, A. 2015. The Molecular Biology of Spindle Assembly Checkpoint Signaling  
 490 Dynamics. *Curr. Biol.* 25:R1002–R1018. doi:10.1016/j.cub.2015.08.051.

491 Nguyen Ba, A.N., B.J. Yeh, D. van Dyk, A.R. Davidson, B.J. Andrews, E.L. Weiss, and A.M.  
 492 Moses. 2012. Proteome-Wide Discovery of Evolutionary Conserved Sequences in  
 493 Disordered Regions. *Sci. Signal.* 5:rs1-rs1.

494 Ogo, N., S. Oishi, K. Matsuno, J. Sawada, N. Fujii, and A. Asai. 2007. Synthesis and  
 495 biological evaluation of L-cysteine derivatives as mitotic kinesin Eg5 inhibitors.  
 496 *Bioorg. Med. Chem. Lett.* 17:3921–4. doi:10.1016/j.bmcl.2007.04.101.

497 Sacristan, C., and G.J.P.L. Kops. 2015. Joined at the hip: Kinetochores, microtubules, and  
 498 spindle assembly checkpoint signaling. *Trends Cell Biol.* 25:21–28.  
 499 doi:10.1016/j.tcb.2014.08.006.

500 Stamatakis, A. 2014. RAxML version 8: a tool for phylogenetic analysis and post-analysis  
 501 of large phylogenies. *Bioinformatics.* 30:1312–3.

doi:10.1093/bioinformatics/btu033.

Stanke, M., A. Tzvetkova, and B. Morgenstern. 2006. AUGUSTUS at EGASP: using EST, protein and genomic alignments for improved gene prediction in the human genome. *Genome Biol.* 7 Suppl 1:S11.1-8. doi:10.1186/gb-2006-7-s1-s11.

Sudakin, V., G.K.T. Chan, and T.J. Yen. 2001. Checkpoint inhibition of the APC / C in HeLa cells. *Cell.* 154:925–936. doi:10.1083/jcb.200102093.

Suijkerbuijk, S.J.E., T.J.P. van Dam, G.E. Karagöz, E. von Castelmur, N.C. Hubner, A.M.S. Duarte, M. Vleugel, A. Perrakis, S.G.D. Rüdiger, B. Snel, and G.J.P.L. Kops. 2012a. The Vertebrate Mitotic Checkpoint Protein BUBR1 Is an Unusual Pseudokinase. *Dev. Cell.* 22:1321–1329. doi:10.1016/j.devcel.2012.03.009.

Suijkerbuijk, S.J.E., M.H.J. Van Osch, F.L. Bos, S. Hanks, N. Rahman, and G.J.P.L. Kops. 2010. Molecular causes for BUBR1 dysfunction in the human cancer predisposition syndrome mosaic variegated aneuploidy. *Cancer Res.* 70:4891–4900. doi:10.1158/0008-5472.CAN-09-4319.

Suijkerbuijk, S.J.E., M. Vleugel, A. Teixeira, and G.J.P.L. Kops. 2012b. Integration of Kinase and Phosphatase Activities by BUBR1 Ensures Formation of Stable Kinetochore-Microtubule Attachments. *Dev. Cell.* 23:745–755. doi:10.1016/j.devcel.2012.09.005.

Tang, Z., R. Bharadwaj, B. Li, and H. Yu. 2001. Mad2-Independent inhibition of APC Cdc20 by the mitotic checkpoint protein BubR1. *Dev Cell.* 1:227–237. doi:10.1016/S1534-5807(01)00019-3.

Taylor, S.S., E. Ha, and F. McKeon. 1998. The human homologue of Bub3 is required for kinetochore localization of Bub1 and a Mad3/Bub1-related protein kinase. *J. Cell Biol.* 142:1–11. doi:10.1083/jcb.142.1.1.

Tromer, E., B. Snel, and G.J.P.L. Kops. 2015. Widespread recurrent patterns of rapid repeat evolution in the kinetochore scaffold KNL1. *Genome Biol. Evol.* 7:2383–2393.

doi:10.1093/gbe/evv140.

Vleugel, M., T. a. Hoek, E. Tromer, T. Sliedrecht, V. Groenewold, M. Omerzu, and G.J.P.L.

Kops. 2015. Dissecting the roles of human BUB1 in the spindle assembly

checkpoint. *J. Cell Sci.* 128:2975–2982. doi:10.1242/jcs.169821.

Vleugel, M., E. Hoogendoorn, B. Snel, and G.J.P.L. Kops. 2012. Evolution and Function of

the Mitotic Checkpoint. *Dev. Cell.* 23:239–250. doi:10.1016/j.devcel.2012.06.013.

Wu, J., S. Kasif, and C. DeLisi. 2003. Identification of functional links between genes

using phylogenetic profiles. *Bioinformatics.* 19:1524–30.

doi:10.1093/BIOINFORMATICS/BTG187.

Xu, P., E. a Raetz, M. Kitagawa, D.M. Virshup, and S.H. Lee. 2013. BUBR1 recruits PP2A

via the B56 family of targeting subunits to promote chromosome congression. *Biol.*

*Open.* 2:479–86. doi:10.1242/bio.20134051.

Yamaguchi, M., R. VanderLinden, F. Weissmann, R. Qiao, P. Dube, N.G. Brown, D.

Haselbach, W. Zhang, S.S. Sidhu, J.-M. Peters, H. Stark, and B.A. Schulman. 2016.

Cryo-EM of Mitotic Checkpoint Complex-Bound APC/C Reveals Reciprocal and

Conformational Regulation of Ubiquitin Ligation. *Mol. Cell.* 63:593–607.

doi:10.1016/j.molcel.2016.07.003.



bioRxiv preprint doi: <https://doi.org/10.1101/088161>; this version posted November 16, 2016. The copyright holder for this preprint (which was not certified by peer review) is the author/funder. All rights reserved. No reuse allowed without permission.

Figure 1

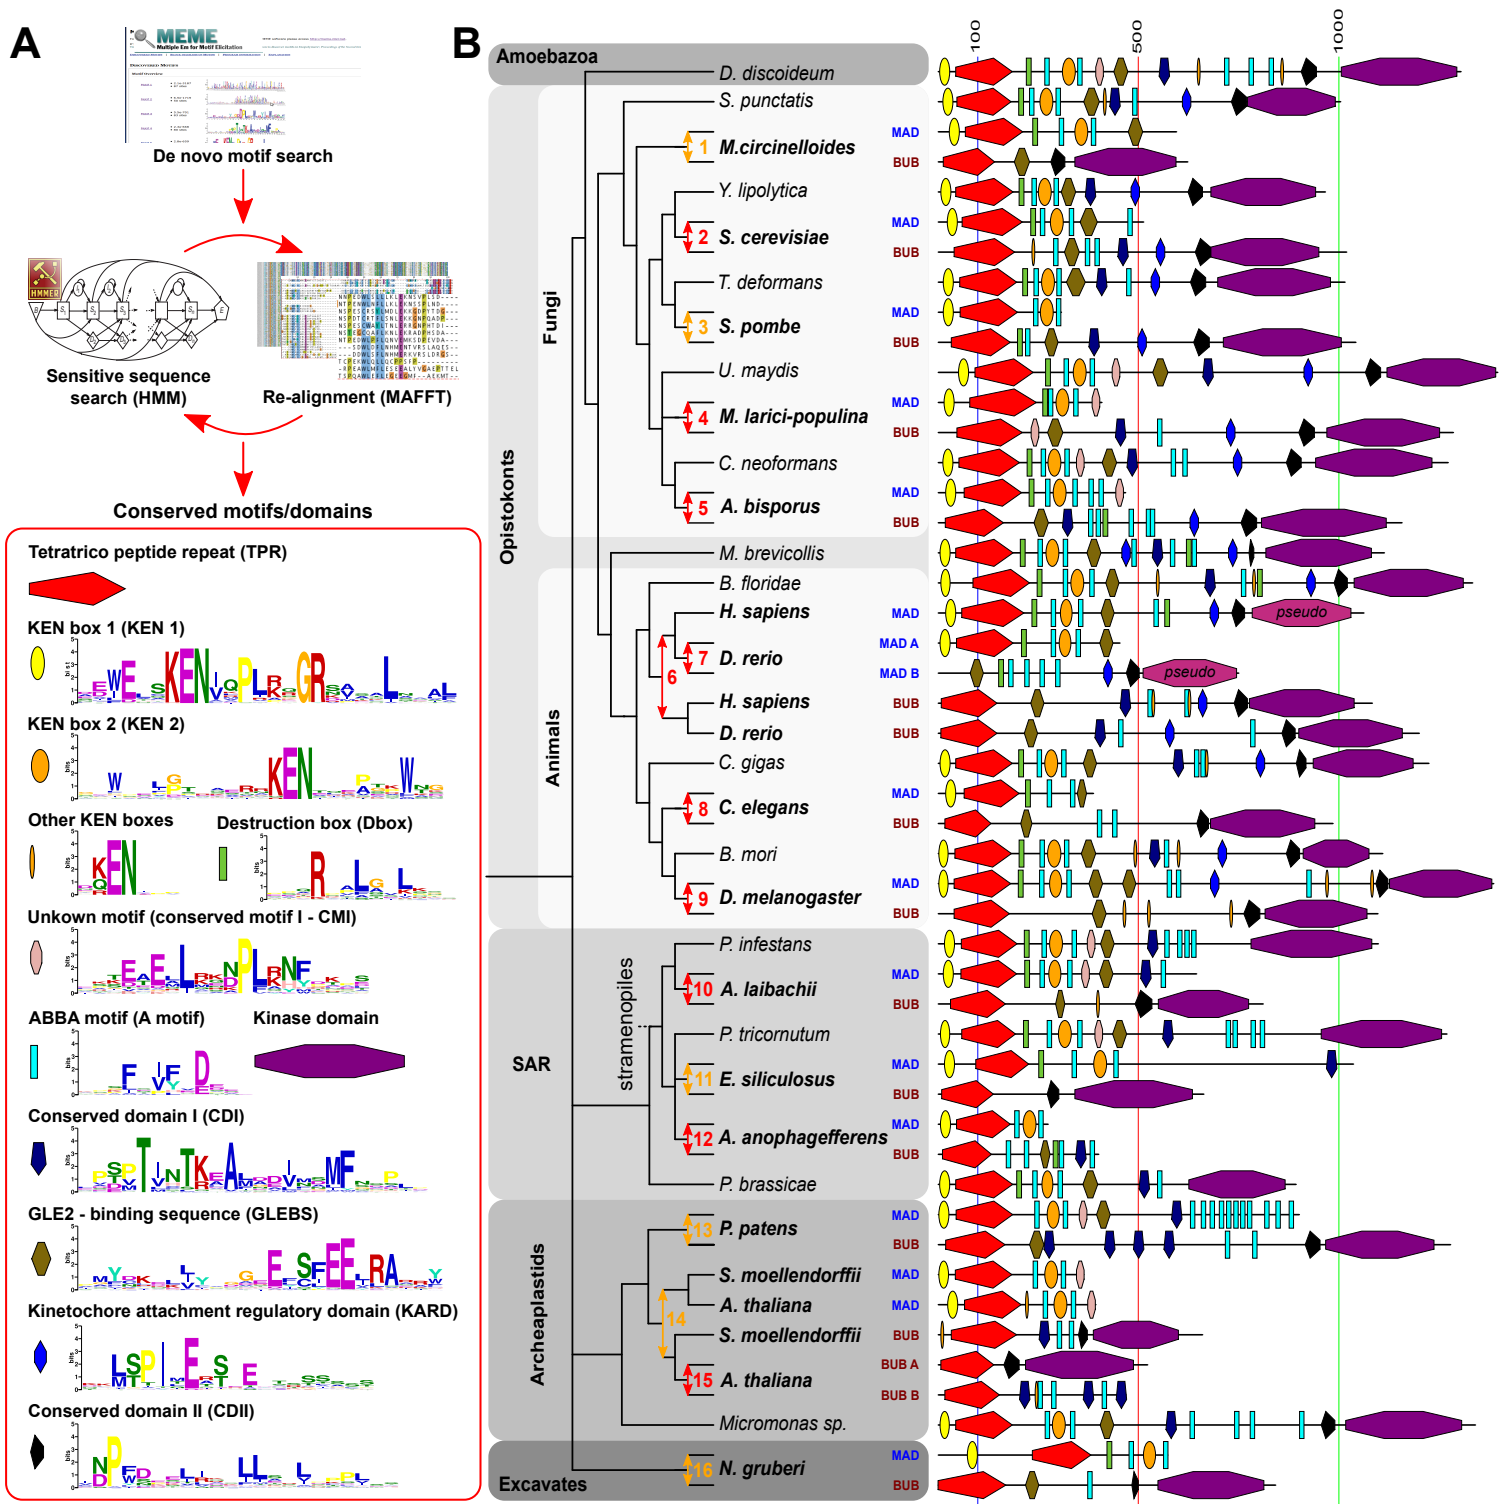

Figure 2 Tromer et al. 2016

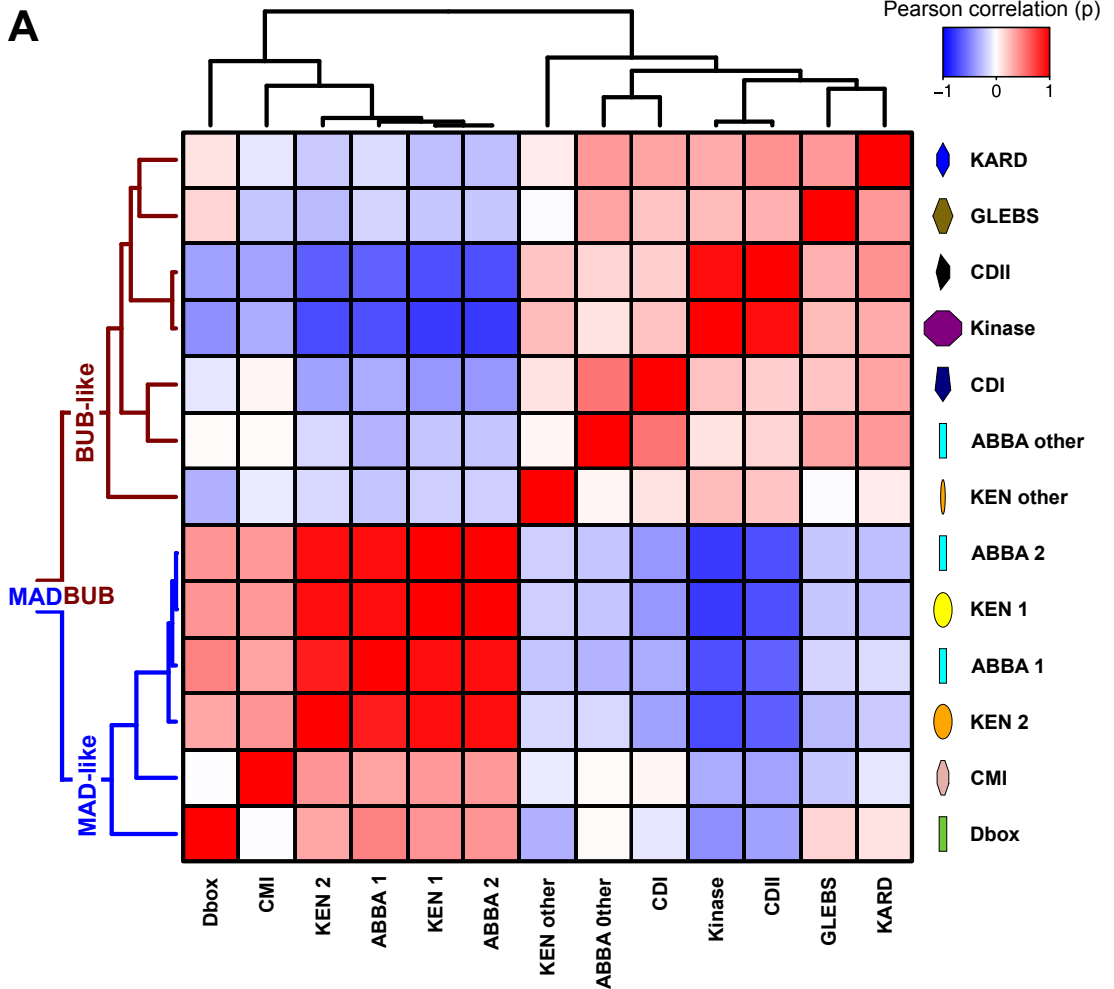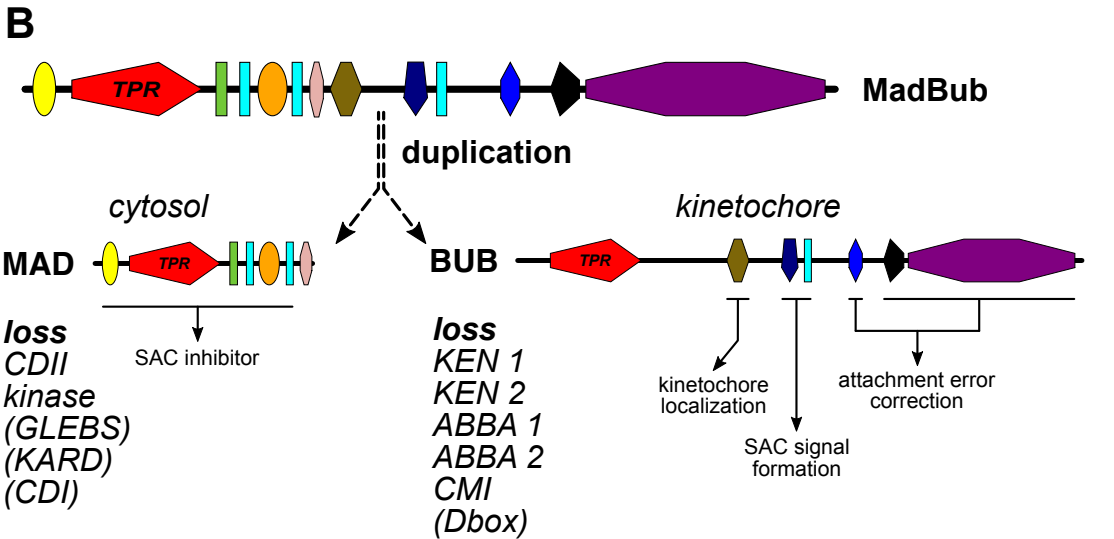

# Figure 3 Tromer et al. 2016

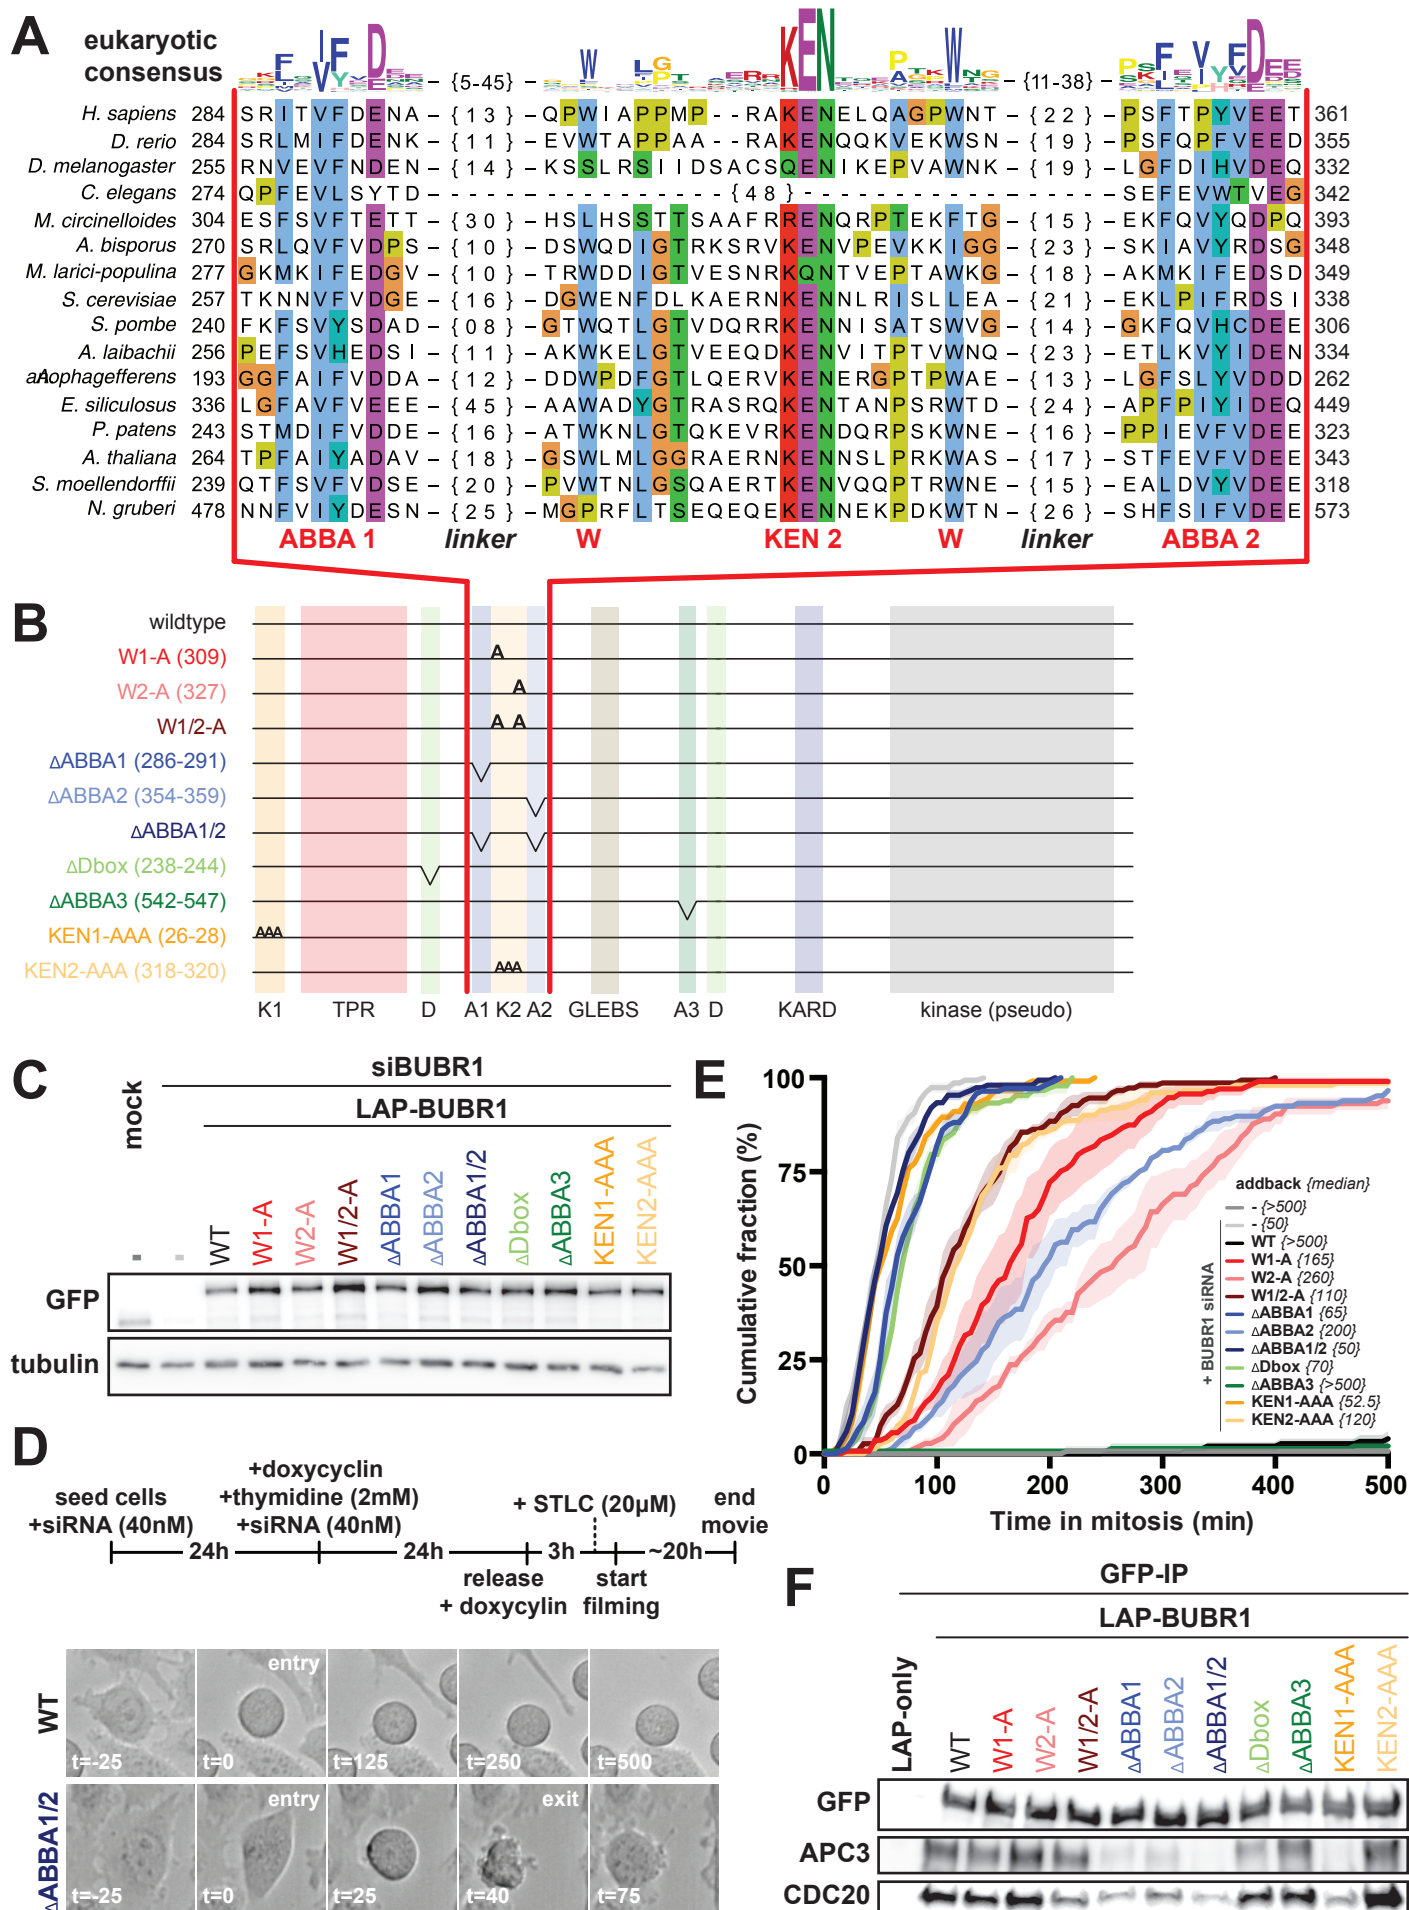

Source: http://biorxiv.org/content/10.1101/088161v1.full.pdf
